# Supplementary material for: A point mutation in cpsE renders Streptococcus pneumoniae nonencapsulated and enhances its growth, adherence and competence
Source: PubMed Central journal article supplement (PMC4243769; doi:10.1186/s12866-014-0210-x), 2014-08-28
Supplement: 12866_2014_210_MOESM1_ESM.pdf [file 12866_2014_210_MOESM1_ESM.pdf]

## Supplementary Figure 1

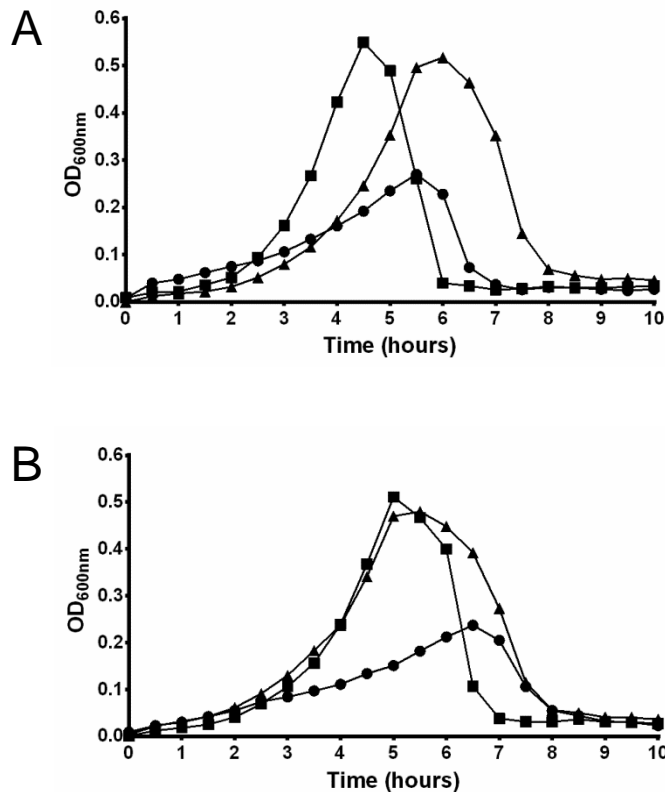

**Figure S1 - Nonencapsulated variant of strain 307.14 has an advantage over the encapsulated variant in growth.** This figure shows two replicates (A and B) of Figure 2. Growth was measured *in vitro* in CDM with 5.5 mM glucose by determining OD<sub>600nm</sub> over 10 hours. Wild type 307.14 encapsulated (●), wild type 307.14 nonencapsulated (■), laboratory mutant 307.14Δcps::Janus, nonencapsulated (▲).

## Supplementary Table S1: Amplification and Sequencing Primers

| Primer           | Sequence (5' → 3')                      | Purpose                                      | Reference                             |
|------------------|-----------------------------------------|----------------------------------------------|---------------------------------------|
| NCRspanFor3      | AAA GGC TGC ACG GAC ATT G               | RFLP                                         | (1)                                   |
| NCRspanRev3      | CCG ATT TGC CAC TAG TGC GTA AGC         | RFLP                                         | (1)                                   |
| rpsL_f           | AGT GTA CAG GGA CGT GCT GAC AAA TGT TGC | PCR <i>rpsL</i> <sub>K56T</sub>              | Engel <i>et al.</i> , 2014, submitted |
| rpsL_r           | ATT GTA TAG CGG ATC TGG CAA TAC GTC ACG | PCR <i>rpsL</i> <sub>K56T</sub>              | Engel <i>et al.</i> , 2014, submitted |
| dexBstart2       | TTT CTC CCG TTT ATG ACA GCC CTA TGG     | PCR Janus cassette                           | (2)                                   |
| aliAend2         | AAG ATT GGA CGC CCT GTA CGA GAT GT      | PCR Janus cassette                           | (2)                                   |
| aliAend1b        | CTG GTT CAC TTG TAC CTT TAT TTC CT      | Verification capsule operon orientation (3') | Morand, B. unpublished                |
| cpsO_F1          | CAA ATG GCC AAT TAG GAA CGG             | Verification capsule operon orientation (3') | Morand, B. unpublished                |
| RB_dexB_cspA_FA  | CCT ATG CAA TGG GAC GAG AGC             | Verification capsule operon orientation (5') | This study                            |
| RB_dexB_cpsA_RAB | TGC AAA GAG CGA CAC AGA GC              | Verification capsule operon orientation (5') | This study                            |
| wchA_SNP_PCR_FOR | ATG GAA ATT GGT AGC AGT AAG TGT TTT G   | Amplification SNP region <i>cpsE</i>         | This study                            |
| wchA_SNP_PCR_REV | CCA TCT CTC ATA AAT ACA ACT TTA ACA GT  | Amplification SNP region <i>cpsE</i>         | This study                            |
| wchA_SNP_SEQ_FOR | CGT AAA GAT GGC GGA CCA GCT             | Sequencing SNP region <i>cpsE</i>            | This study                            |
| wchA_SNP_SEQ_REV | CCA CAT CTA ATT TTA CAA CAG CGT CAA     | Sequencing SNP region <i>cpsE</i>            | This study                            |
| SNP_2904_3_FOR   | GCT GGT TCT CTC ATT CAA CTC TCA CTT     | Amplification/sequencing SNP                 | This study                            |
| SNP_2904_3_REV   | TTT GAT ACT TCG AGT TCA GAC GTG ACA     | Amplification/sequencing SNP                 | This study                            |
| SNP_42678_FOR_1  | AAA CCA GCT CTT CCA CAC TTG AAG T       | Amplification/sequencing SNP                 | This study                            |
| SNP_42678_REV_1  | AGT CTC CTA AAT GCA CTT AGC CCT T       | Amplification/sequencing SNP                 | This study                            |
| SNP_80143_FOR_1  | TAG AAG TAG CAG AGC CAA GCT TGA TTA     | Amplification/sequencing SNP                 | This study                            |
| SNP_80143_REV_1  | GTT TTT GAG CTG TTT TGA CCG TCA ATT     | Amplification/sequencing SNP                 | This study                            |
| SNP_81628_FOR_1  | TTT GCC TGG TAT GAA GTG TTG GTA AGT     | Amplification/sequencing SNP                 | This study                            |
| SNP_81628_REV_1  | CAA GGC TAA ATT CTT CAG AGG AGG GAG     | Amplification/sequencing SNP                 | This study                            |
| SNP_86569_FOR_1  | TAG CCT AAA ACT AAA CGA TCA AGC ACG     | Amplification/sequencing SNP                 | This study                            |
| SNP_86569_REV_1  | TTC CTT CTT CGC CAA TAA TAG CTA CCT     | Amplification/sequencing SNP                 | This study                            |
| SNP_60490_FOR_1  | ACC CTT AAA CTG TAG ATG GGC AAC AAA     | Amplification/sequencing SNP                 | This study                            |
| SNP_60490_REV_1  | AAT CAA CTC AAC TGG CAG CCT ATC TAG     | Amplification/sequencing SNP                 | This study                            |

1. **Hathaway LJ, Brugger S, Martynova A, Aebi S, Muhlemann K.** 2007. Use of the Agilent 2100 bioanalyzer for rapid and reproducible molecular typing of *Streptococcus pneumoniae*. *J. Clin. Microbiol.* **45**:803-809.
2. **Hathaway LJ, Brugger SD, Morand B, Bangert M, Rotzetter JU, Hauser C, Graber WA, Gore S, Kadioglu A, Muhlemann K.** 2012. Capsule type of *Streptococcus pneumoniae* determines growth phenotype. *PLoS Pathog.* **8**:e1002574.

**Supplementary Table S2: Preparation of the chemically defined medium (CDM), according to (1), modified**

| Order of Addition to SB | Substance                                   | Provider      | Product Number | Stock Concentration  | Amount stock for 1 l | Final Concentration | Remarks                              | Aliquots / Storage       |
|-------------------------|---------------------------------------------|---------------|----------------|----------------------|----------------------|---------------------|--------------------------------------|--------------------------|
| 1                       | Iron(II) sulfate heptahydrate               | Merck KGaA    | 103965         | 10 mg/ml RWT1        | 0.5 ml               | 0.018 mM            | freshly prepared                     |                          |
| 2                       | Iron(III) nitrate nonahydrate               | Merck KGaA    | 103883         | 10 mg/ml RWT1        | 0.1 ml               | 0.0025 mM           | freshly prepared                     |                          |
| 3                       | Potassium phosphate dibasic                 | Fluka         | 17835          |                      | 0.2 g                | 1.1 mM              | freshly prepared and dissolved in SB |                          |
| 4                       | Potassium dihydrogen phosphate              | Merck KGaA    | 104873         |                      | 1 g                  | 7.3 mM              | freshly prepared and dissolved in SB |                          |
| 5                       | Magnesium sulfate                           | Sigma-Aldrich | M7506          | 11.966 g/70 ml RWT1  | 2 ml                 | 2.8 mM              | dissolve in ice bath                 | sterile filtered, -20 °C |
| 6                       | Manganese(II) sulfate monohydrate           | Merck KGaA    | 105941         | 200 mg/40 ml RWT1    | 1 ml                 | 0.03 mM             |                                      | sterile filtered, -20 °C |
| 7                       | L-Alanine                                   | Sigma-Aldrich | A7627          | 2 g/100 ml RWT1      | 5 ml                 | 1.1 mM              |                                      | autoclaved, 4 °C         |
| 8                       | L-Arginine                                  | Sigma-Aldrich | A5006          | 2 g/100 ml RWT1      | 5 ml                 | 0.57 mM             |                                      | autoclaved, 4 °C         |
| 9                       | L-Aspartic acid                             | Sigma-Aldrich | A9256          | 2 g/100 ml 0.2M HCl  | 5 ml                 | 0.75 mM             |                                      | sterile filtered, 4 °C   |
| 10                      | L-Phenylalanine                             | Merck KGaA    | 107256         | 2 g/100 ml 0.01M HCl | 5 ml                 | 0.61 mM             | warm to dissolve                     | autoclaved, RT           |
| 11                      | L-Proline                                   | Sigma-Aldrich | P0380          | 2 g/100 ml RWT1      | 5 ml                 | 0.87 mM             |                                      | autoclaved, 4 °C         |
| 12                      | L-Serine                                    | Sigma-Aldrich | S4500          | 2 g/100 ml RWT1      | 5 ml                 | 0.95 mM             |                                      | autoclaved, 4 °C         |
| 13                      | L-Glutamic acid monosodium salt monohydrate | Sigma-Aldrich | G2834          | 2.544 g/100 ml RWT1  | 5 ml                 | 0.68 mM             |                                      | sterile filtered, 4 °C   |
| 14                      | L-Glutamine                                 | Merck KGaA    | 100289         | 4 g/100 ml 1 M HCl   | 5 ml                 | 1.4 mM              |                                      | sterile filtered, 4 °C   |
| 15                      | Glycine                                     | Merck KGaA    | 104201         | 2 g/100 ml RWT1      | 5 ml                 | 1.3 mM              |                                      | autoclaved, 4 °C         |

| Order of Addition to SB | Substance                                 | Provider      | Product Number | Stock Concentration     | Amount stock for 1 l | Final Concentration | Remarks            | Aliquots / Storage       |
|-------------------------|-------------------------------------------|---------------|----------------|-------------------------|----------------------|---------------------|--------------------|--------------------------|
| 16                      | L-Threonine                               | Merck KGaA    | 108411         | 4 g/100 ml RWT1         | 5 ml                 | 1.7 mM              |                    | autoclaved, 4 °C         |
| 17                      | L-Tryptophan                              | Sigma-Aldrich | T8941          | 2 g/100 ml 0.1 M NaOH   | 5 ml                 | 0.49 mM             | protect from light | sterile filtered, 4 °C   |
| 18                      | L-Tyrosine                                | Merck KGaA    | 108371         | 2.884 g/100 ml 1 M NaOH | 5 ml                 | 0.8 mM              | protect from light | sterile filtered, 4 °C   |
| 19                      | L-Valine                                  | Merck KGaA    | 108495         | 2 g/100 ml RWT1         | 5 ml                 | 0.85 mM             |                    | autoclaved, 4 °C         |
| 20                      | L-Histidine monohydrochloride monohydrate | Sigma-Aldrich | H8125          | 2.7 g/100 ml RWT1       | 5 ml                 | 0.64 mM             |                    | autoclaved, 4 °C         |
| 21                      | L-Isoleucine                              | Merck KGaA    | 105362         | 2 g/100 ml RWT1         | 5 ml                 | 0.76 mM             | warm to dissolve   | autoclaved, 4 °C         |
| 22                      | L-Leucine                                 | Sigma-Aldrich | L8912          | 2 g/100 ml RWT1         | 5 ml                 | 0.76 mM             | warm to dissolve   | autoclaved, RT           |
| 23                      | L-Lysine monohydrochloride                | Sigma-Aldrich | L5626          | 2.498 g/100 ml RWT1     | 5 ml                 | 0.68 mM             |                    | autoclaved, 4 °C         |
| 24                      | L-Methionine                              | Merck KGaA    | 105707         | 2 g/100 ml RWT1         | 5 ml                 | 0.67 mM             |                    | autoclaved, 4 °C         |
| 25                      | Folic acid                                | Sigma-Aldrich | F8758          | 30 mg/6 ml 1 M NaOH     | 0.16 ml              | 0.0018 mM           | protect from light | sterile filtered, -20 °C |
| 26                      | Biotin                                    | Sigma-Aldrich | B4501          | 10 mg/100 ml RWT1       | 2 ml                 | 0.00082 mM          | warm to dissolve   | sterile filtered, -20 °C |
| 27                      | Nicotinamide                              | Sigma-Aldrich | N3376          | 40 mg/ 8 ml RWT1        | 0.2 ml               | 0.0082 mM           |                    | sterile filtered, -20 °C |
| 28                      | D-Pantothenic acid hemicalcium salt       | Sigma-Aldrich | P2250          | 80 mg/8 ml RWT1         | 0.2 ml               | 0.0084 mM           |                    | sterile filtered, -20 °C |
| 29                      | 4-aminobenzoic acid                       | Sigma-Aldrich | A9878          | 8 mg/8 ml RWT1          | 0.2 ml               | 0.0015 mM           |                    | sterile filtered, -20 °C |
| 30                      | Pyridoxal hydrochloride                   | Sigma-Aldrich | P9130          | 40 mg/8 ml RWT1         | 0.2 ml               | 0.0049 mM           | protect from light | sterile filtered, -20 °C |
| 31                      | Pyridoxine hydrochloride                  | Sigma-Aldrich | P9755          | 40 mg/8 ml RWT1         | 0.2 ml               | 0.0049 mM           | protect from light | sterile filtered, -20 °C |
| 32                      | Pyridoxamine dihydrochloride              | Fluka         | P9380          | 40 mg/8 ml RWT1         | 0.2 ml               | 0.0041 mM           | protect from light | sterile filtered, -20 °C |
| 33                      | Thiamine hydrochloride                    | Sigma-Aldrich | T4625          | 40 mg/8 ml RWT1         | 0.2 ml               | 0.003 mM            | protect from light | sterile filtered, -20 °C |
| 34                      | Vitamin B <sub>12</sub>                   | Sigma-Aldrich | V2876          | 5 mg/10 ml RWT1         | 0.2 ml               | 0.000074 mM         | protect from light | sterile filtered, -20 °C |

| Order of Addition to SB                                                                                                                                       | Substance                                   | Provider      | Product Number | Stock Concentration                                                                         | Amount stock for 1 l | Final Concentration | Remarks                              | Aliquots / Storage       |
|---------------------------------------------------------------------------------------------------------------------------------------------------------------|---------------------------------------------|---------------|----------------|---------------------------------------------------------------------------------------------|----------------------|---------------------|--------------------------------------|--------------------------|
| 35                                                                                                                                                            | (-)-Riboflavin                              | Sigma-Aldrich | R4500          | 50 mg /+ 0.6 ml glacial acetic acid + 400 ml RWT1, dissolve, complement to 500 ml with RWT1 | 20 ml                | 0.0053 mM           | warm to dissolve, protect from light | sterile filtered, -20 °C |
| 36                                                                                                                                                            | Guanine hydrochloride                       | Sigma-Aldrich | 51030          | 0.4 g/100 ml 1 M HCl                                                                        | 5 ml                 | 0.11 mM             |                                      | sterile filtered, RT     |
| 37                                                                                                                                                            | Adenine hemisulfate salt                    | Sigma-Aldrich | A9126          | 0.4 g/100 ml 1 M HCl                                                                        | 5 ml                 | 0.11 mM             |                                      | sterile filtered, RT     |
| 38                                                                                                                                                            | Uracil                                      | Sigma-Aldrich | U0750          | 0.4 g/200 ml RWT1                                                                           | 10 ml                | 0.18 mM             | warm to dissolve                     | autoclaved, RT           |
| 39                                                                                                                                                            | Calcium chloride                            | Merck KGaA    | 102083         | 202.4 mg/40 ml RWT1                                                                         | 1 ml                 | 0.046 mM            |                                      | sterile filtered, -20 °C |
| 40                                                                                                                                                            | Sodium acetate                              | Merck KGaA    | 106268         |                                                                                             | 2.7126 g             | 33.07 mM            | dissolve in 100 ml SB                |                          |
| 41                                                                                                                                                            | di-Sodium hydrogen phosphate                | Merck KGaA    | 106586         |                                                                                             | 7.35 g               | 52 mM               | dissolve in 200 ml SB                |                          |
| 42                                                                                                                                                            | Sodium dihydrogen phosphate monohydrate     | Merck KGaA    | 106346         |                                                                                             | 3.195 g              | 23 mM               | dissolve in 100 ml SB                |                          |
| 43                                                                                                                                                            | Choline chloride                            | Sigma-Aldrich | C7527          |                                                                                             | 1 g                  | 7.2 mM              | dissolve in 100 ml SB                |                          |
| 44                                                                                                                                                            | Sodium hydrogen carbonate                   | Merck KGaA    | 106329         |                                                                                             | 2.5 g                | 30 mM               | dissolve in 200 ml SB                |                          |
| <b>1) Measure pH and adjust to 6.85, 2) complement to 1000 ml SB, 3) filter sterilization and storage at 4 °C (use medium within three weeks of storage).</b> |                                             |               |                |                                                                                             |                      |                     |                                      |                          |
| <b>Add the following before use:</b>                                                                                                                          |                                             |               |                |                                                                                             |                      |                     |                                      |                          |
| Order of Addition to SB                                                                                                                                       | Substance                                   | Provider      | Product Number | Stock Concentration                                                                         | Amount stock for 1 l | Final Concentration | Remarks                              | Aliquots / Storage       |
| 45                                                                                                                                                            | L-Cysteine hydrochloride                    | Sigma-Aldrich | C7477          | 0.75 g/10 ml RWT1                                                                           | 10 ml                | 4.8 mM              |                                      | sterile filtered, 4 °C   |
| 46                                                                                                                                                            | β-Nicotinamide adenine dinucleotide hydrate | Sigma-Aldrich | N1511          | 10 mg/ml RWT1                                                                               | 0.25 ml              | 0.0038 mM           |                                      | sterile filtered, 4 °C   |
| 47                                                                                                                                                            | Copper(II) sulfate pentahydrate             | Sigma-Aldrich | C7631          | 10 mg/10 ml RWT1                                                                            | 0.6 ml               | 0.0024 mM           |                                      | sterile filtered -20 °C  |
| 48                                                                                                                                                            | Manganese(II) sulfate monohydrate           | Merck KGaA    | 105941         | 125 mg/5 ml                                                                                 | 1 ml                 | 0.15 mM             |                                      | sterile filtered -20 °C  |

### Preparation of the Sørensen phosphate buffer (pH 7) for 1 liter CDM

| <b>Solution A</b>                                     |                        | <b>Final Concentration</b> |
|-------------------------------------------------------|------------------------|----------------------------|
| Potassium dihydrogen phosphate (Merck 104873)         | 3.632 g in 400 ml RWT1 | 26 mM                      |
|                                                       |                        |                            |
| <b>Solution B</b>                                     |                        |                            |
| di-Sodium hydrogen phosphate dihydrate (Merck 106580) | 8.316 g in 700 ml RWT1 | 41 mM                      |
|                                                       |                        |                            |
| <b>Sørensen phosphate buffer (pH 7)</b>               |                        |                            |
| Solution A: 392 ml<br>Solution B: 608 ml              |                        |                            |

RWT1 = ultra-pure distilled water, SB = Sørensen phosphate buffer, RT = room temperature

1. **van de Rijn I, Kessler RE.** 1980. Growth characteristics of group A streptococci in a new chemically defined medium. Infect. Immun. **27**:444-448.

**Supplementary Table S3: Antibiotic susceptibilities.** Minimal inhibitory concentrations (MIC) of the two *S. pneumoniae* 307.14 wild type variants to selected antibiotics determined by Etest<sup>®</sup> after 24 h and 48 h of incubation at 37 °C and 5 % CO<sub>2</sub> atmosphere.

| Antibiotic            | Etest <sup>®</sup> code | MIC of 307.14 encapsulated |       | MIC of 307.14 nonencapsulated |       |
|-----------------------|-------------------------|----------------------------|-------|-------------------------------|-------|
|                       |                         | 24 h                       | 48 h  | 24 h                          | 48 h  |
| Ampicillin            | AM                      | 0.016                      | 0.016 | 0.016                         | 0.016 |
| Benzylpenicillin      | PG                      | 0.016                      | 0.016 | 0.016                         | 0.023 |
| Ceftriaxone           | TX                      | 0.012                      | 0.016 | 0.016                         | 0.016 |
| Cephalothin           | CE                      | 0.064                      | 0.064 | 0.25                          | 0.25  |
| Vancomycin            | VA                      | 0.25                       | 0.25  | 0.25                          | 0.25  |
| Rifampicin            | RI                      | 0.016                      | 0.016 | 0.016                         | 0.016 |
| Gentamicin            | GM                      | 6 (8) <sup>1</sup>         | 8     | 2 (3) <sup>1</sup>            | 3     |
| Minocycline           | MC                      | 0.094                      | 0.125 | 0.094                         | 0.125 |
| Tetracycline          | TC                      | 0.094                      | 0.094 | 0.125                         | 0.094 |
| Colistin <sup>2</sup> | CO                      | >256                       | >256  | >256                          | >256  |

<sup>1</sup>Heterogeneous MIC value; minor number of colonies shows a slightly higher antibiotic resistance (this MIC value is given in brackets).

<sup>2</sup>The antibiotic colistin was used as a reference antibiotic. Gram-positive aerobic cocci are generally resistant to colistin (1).

1. **Falagas ME, Kasiakou SK.** 2005. Colistin: the revival of polymyxins for the management of multidrug-resistant gram-negative bacterial infections. Clin. Infect. Dis. **40**:1333-1341.
